# Supplementary material for: Five-year visual acuity outcomes and injection patterns in patients with pro-re-nata treatments for AMD, DME, RVO and myopic CNV
Source: PubMed Central journal article supplement — Br J Ophthalmol. 2016 May 23;101(3):353–9. doi: 10.1136/bjophthalmol-2016-308668 (PMC5339568; doi:10.1136/bjophthalmol-2016-308668), 2016-05-23
Supplement: bjophthalmol-2016-308668supp.pdf [file bjophthalmol-2016-308668supp.pdf]

Supplementary Figure 1: Association between baseline VA and VA at year one and five. In all disease groups, patients in the quartile with lowest baseline VA benefitted more from anti-VEGF injections compared to patients in the quartile with highest baseline VA.

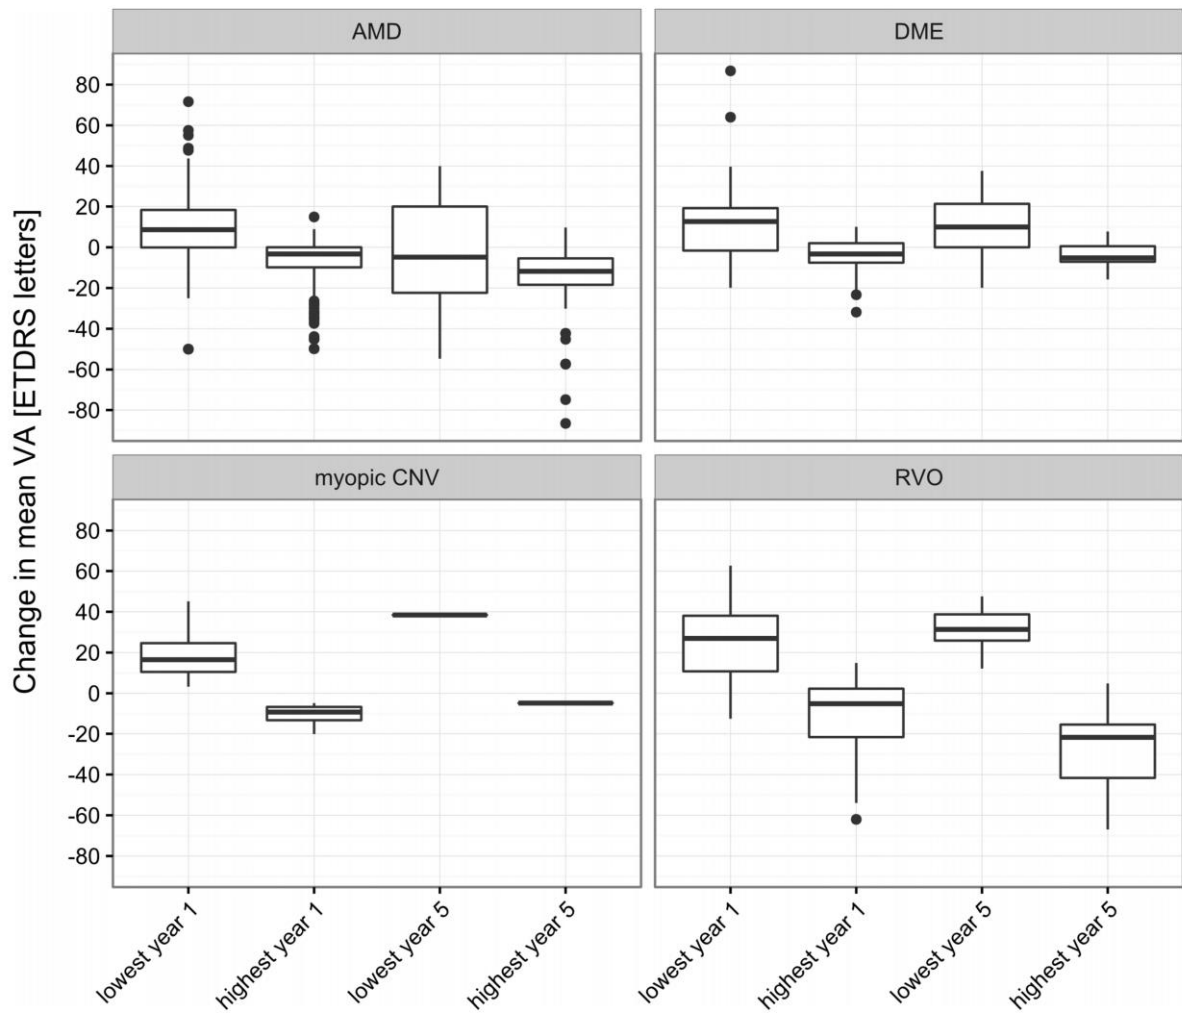

| Pathology  | Treatment initiation     | Re-injections**                      |
|------------|--------------------------|--------------------------------------|
| AMD        | 3 monthly injections     | series of 3 monthly injections ‡     |
| DME        | 3-4 monthly injections * | series of 1-3 monthly injections *   |
| RVO        | 3 monthly injections     | series of 3 monthly injections ‡     |
| Myopic CNV | 1 injection †            | series of 1 - 3 monthly injections * |

**Supplementary Table 1: Overview of our current PRN treatment protocols.**

\* based on disease activity / extent of edema

\*\* If disease activity is noted on a follow-up visit, the first injection of the ensuing treatment cycle is given within one to two weeks.

† used to be three initial injections during the first years of data acquisition

‡ TAE allowed in case of minimal disease activity (six and eight week intervals)

| Group    | AMD (> 50 yrs) | MD (< 50 yrs) | DME         | Myopic CNV  | RVO         |
|----------|----------------|---------------|-------------|-------------|-------------|
| Eyes     | 1661           | 41            | 479         | 45          | 351         |
| Patients | 1326           | 38            | 333         | 41          | 334         |
| Mean age | 77.8           | 37.6          | 64.8        | 54.4        | 69.0        |
| Female   | 840 (63%)      | 19 (50%)      | 139 (42%)   | 26 (63%)    | 166 (50%)   |
| Mean VA  | 0.51 ± 0.37    | 0.50 ± 0.52   | 0.49 ± 0.38 | 0.57 ± 0.40 | 0.54 ± 0.39 |

**Supplementary Table 2:** Baseline patient characteristics for all study patients. Mean age is presented in years; mean VA in logMAR.

DME = Diabetic macular edema; AMD = Age-related macular degeneration; MD = Macular disease other than AMD; CNV = choroidal neovascularization; RVO = retinal vein occlusion
